# Supplementary material for: UV-Visible photo-reactivity of permanently polarized inorganic nanotubes coupled to gold nanoparticles
Source: Royal Society of Chemistry journal article supplement (doi:10.1039/d2nr05796d), 2023-01-01
Supplement: d2nr05796d1.pdf [file d2nr05796d1.pdf]

Electronic Supplementary Information for

“UV-Visible photo-reactivity of permanently polarized inorganic  
nanotubes coupled to gold nanoparticles”

Sabyasachi Patra<sup>a,b,\*</sup>, Fabienne Testard<sup>a</sup>, Frédéric Gobeaux<sup>a</sup>, Lorette Sicard<sup>c</sup>, Delphine Shaming<sup>c</sup>,

Sophie Le Caër<sup>a,\*</sup>, Antoine Thill<sup>a,\*</sup>

<sup>a</sup>Université Paris-Saclay, CEA, CNRS, NIMBE, 91191, Gif-sur-Yvette, France

<sup>b</sup>Radiochemistry Division, Bhabha Atomic Research Centre, Trombay, Mumbai - 400085, India

<sup>c</sup>Université de Paris, ITODYS, CNRS, UMR 7086, 15 rue J.-A. de Baïf, F-75013, Paris, France

\*E-mail: [spatra@barc.gov.in](mailto:spatra@barc.gov.in), [sspatra86@gmail.com](mailto:sspatra86@gmail.com), [sophie.le-caer@cea.fr](mailto:sophie.le-caer@cea.fr), [antoine.thill@cea.fr](mailto:antoine.thill@cea.fr)

**1. Cryo-TEM images showing the morphology of pristine Imo-CH<sub>3</sub> NTs after dialysis**

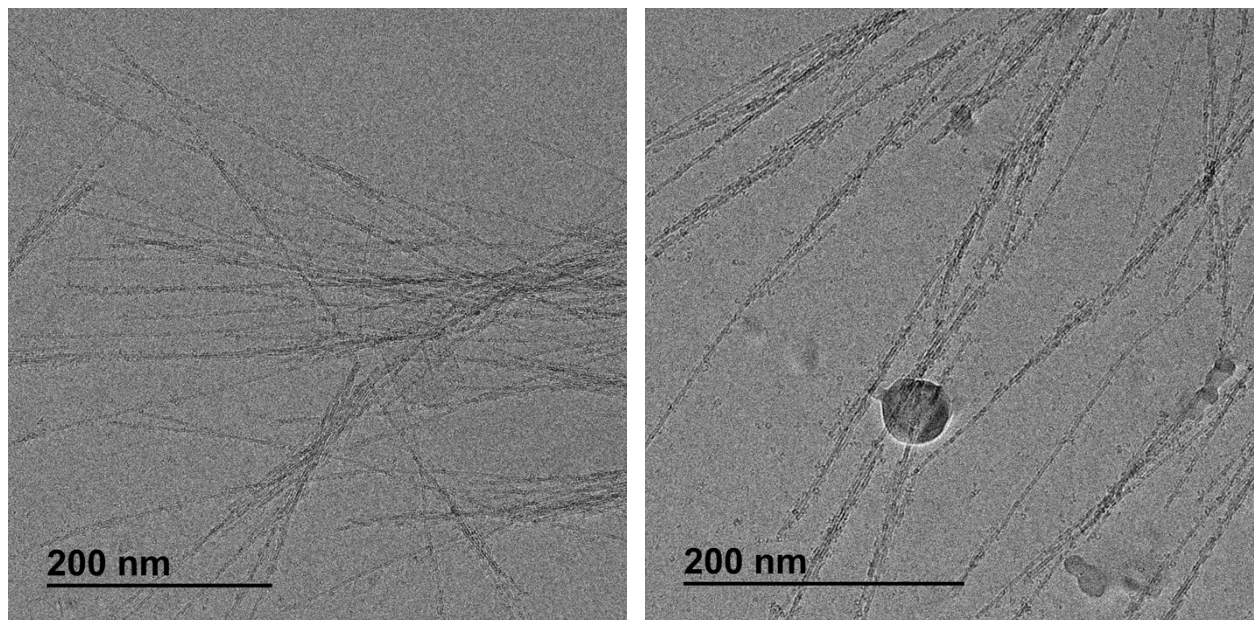

*Figure S1. Cryo-TEM images of pristine Imo-CH<sub>3</sub> NTs.*

## 2. SAXS data of pristine Imo-CH<sub>3</sub>

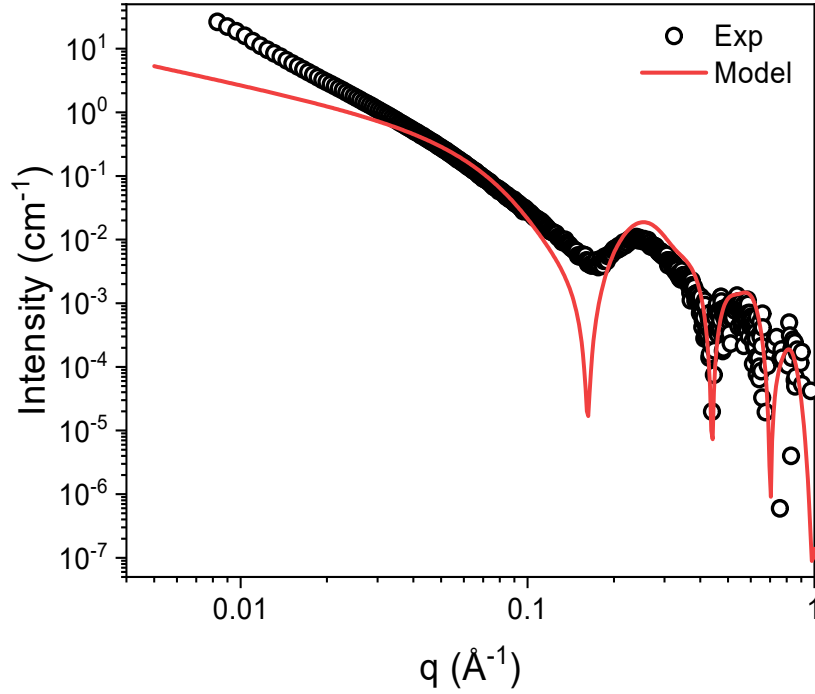

**Figure S2.** SAXS profile of pristine Imo-CH<sub>3</sub> (circles) and the simulated SAXS profile (red line). In the low  $q$  range, the excess scattering signal results from interactions between imogolite NTs or aggregations of imogolite NTs.

**Table S1.** Parameters for the simulated SAXS profile of pristine Imo-CH<sub>3</sub>

|                                                    | <b>Imo-CH<sub>3</sub></b> |
|----------------------------------------------------|---------------------------|
| Tube concentration ( $N$ : tubes/cm <sup>3</sup> ) | $5.4 \times 10^{14}$      |
| Inner radius (Å)                                   | 9.3                       |
| Wall thickness (Å)                                 | 6.0                       |
| Imogolite length (Å)                               | 3500                      |
| Number of Si/ring                                  | 16                        |
| Number of atoms/structural unit                    | 100                       |
| Lattice parameter (Å)                              | 4.3                       |
| Internal electronic density (e.Å <sup>-3</sup> )   | 0.110                     |
| External electronic density (e.Å <sup>-3</sup> )   | 0.334                     |
| Number of 1 tube in bundles                        | 2                         |
| Number of 2 tubes in bundles                       | 0                         |
| Number of 3 tubes in bundles                       | 2                         |
| Number of 4 tubes in bundles                       | 1                         |

### 3. SAXS analysis of Solution-A

For Solution-A, after subtraction of the imogolite-water suspension contribution, the total scattering can be adjusted by a sum of two contributions with parameters reported in table S2:

- A first for core/shell cylinder with only gold and chloride in the shell whose typical signature is visible for  $q > 0.3 \text{ \AA}^{-1}$ .
- a second in the low  $q$  range for the fractal organization of the cylinders (the Guinier contribution of the scattering in the low  $q$  range is not considered due to the  $q_{min}$  cut off):

$$\frac{B}{q^p} \times \left[ 1 - \text{erf} \left( \frac{qR_g}{\sqrt{6}} \right)^2 \right] + b_f$$

With  $B$  the fractal amplitude,  $P$  the fractal slope,  $R_g$  a Guinier radius and  $b_f$  the background.

The size of the internal diameter of the gold shell is fixed by the external diameter of imogolite (3 nm). The number of imogolite is fixed by the weight composition of the sample (2.3 mg.mL<sup>-1</sup>). The thickness of the shell of the SAXS model was then adjusted to 0.67 nm (imposing the value of the scattering length density (SLD) of the shell) in order to properly fit the experimental SAXS pattern.

**Table S2.** Parameters used to simulate the SAXS profile of Solution-A subtracted with pristine Imo-CH<sub>3</sub>. Simulation consists of a fractal organization of imogolite surrounded by gold (core/shell model).

|                             |                                                     | Simulation parameters |  |
|-----------------------------|-----------------------------------------------------|-----------------------|--|
| <b>Core/shell cylinder</b>  | Tube concentration ( $N$ : tubes.cm <sup>-3</sup> ) | 5.4×10 <sup>14</sup>  |  |
|                             | Inner diameter (nm)                                 | 3.06                  |  |
|                             | Outer diameter (nm)                                 | 4.4                   |  |
|                             | length (nm)                                         | 350                   |  |
|                             | *SLD of cylinder core (cm <sup>-2</sup> )           | 0                     |  |
|                             | SLD of cylinder shell (cm <sup>-2</sup> )           | 1.9×10 <sup>10</sup>  |  |
|                             | SLD of medium (cm <sup>-2</sup> )                   | 0                     |  |
| <b>Fractal organization</b> | P (fractal slope)                                   | 2.1                   |  |
|                             | B (fractal amplitude)                               | 0.001                 |  |
|                             | R <sub>g</sub> (nm)                                 | 6.0                   |  |
|                             | b <sub>f</sub>                                      | 0.012                 |  |

\*SLD: scattering length density

#### 4. XPS Cl 2p photoelectron core-level spectrum of Solution-A

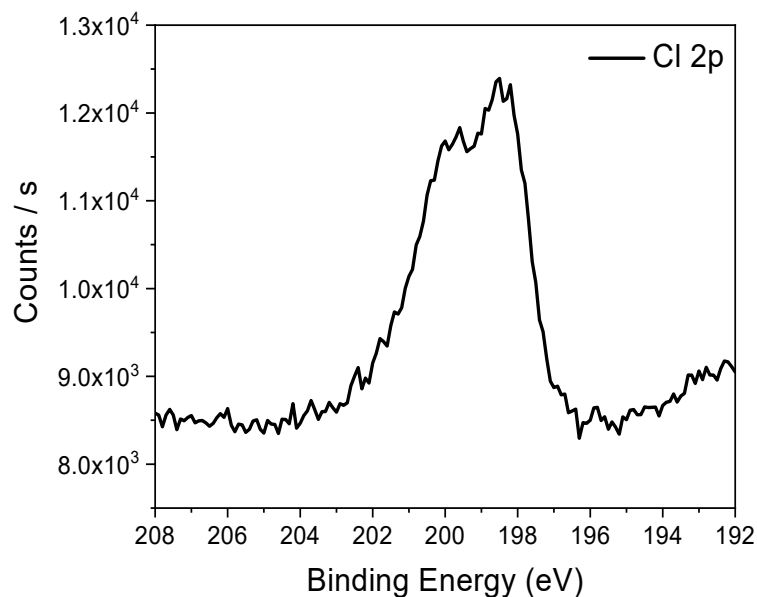

**Figure S3.** Cl 2p photoelectron core-level spectrum of Solution-A.

## 5. Photo-reduction of gold in the presence of Imo-CH<sub>3</sub> NTs in an aqueous medium

To unravel the participation of Imo-CH<sub>3</sub> photoelectrons in the reduction of gold ions, control experiments were performed at acidic pH in the absence and presence of Imo-CH<sub>3</sub> nanotubes (pH = 2.4, Figure S4a and S4b, respectively) without addition of propan-2-ol. The study was performed at acidic pH in order to be able to follow the reduction of Au(III) ions using UV-Vis spectroscopy (as HAuCl<sub>4</sub> solution shows an intense absorption around 300 nm at acidic pH). Propan-2-ol was not added to eliminate any source of electrons from direct photolysis of propan-2-ol so as to verify the photocatalytic role of Imo-CH<sub>3</sub> NTs in the reduction reaction. Comparison of both figures shows that reduction of Au(III) ions under UV illumination (time resolved decrease in absorbance at ~300 nm region) is highly facilitated in the presence of Imo-CH<sub>3</sub> NTs. Thus Imo-CH<sub>3</sub> is necessary for the formation of GNPs. This can only be explained by means of the Imo-CH<sub>3</sub>-mediated photocatalysis.

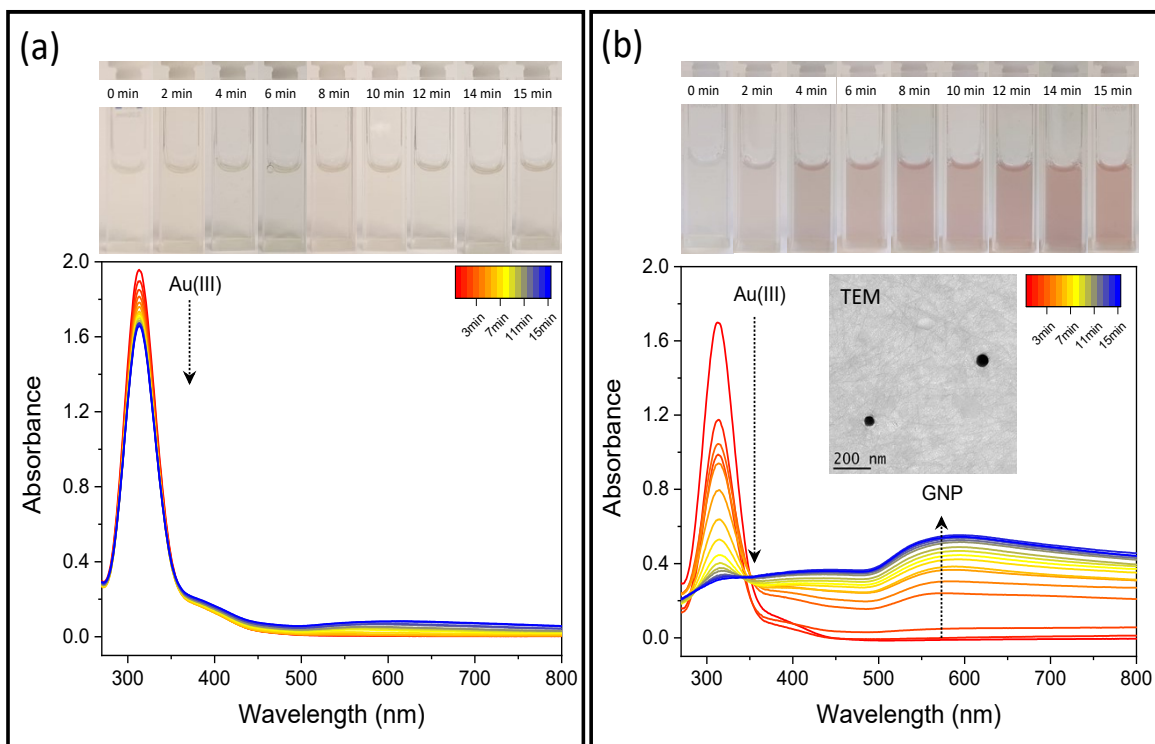

**Figure S4.** Evolution of UV-Vis absorption spectra of  $\text{HAuCl}_4$  aqueous solution (a) and  $\text{HAuCl}_4$  – Imo- $\text{CH}_3$  mixed aqueous solution (b) during UV illumination under air atmosphere. The concentration of  $\text{HAuCl}_4$  in both experiments is 0.34 mM. In experiment “b”, imogolite is added to attain 1% w/w of gold per Imo- $\text{CH}_3$ . The pH of the medium in all experiments was 2.4. Inset of “b” gives the TEM image of the sample at the end of UV illumination.

## 6. SAXS profile of photolytically-produced GNPs

The SAXS patterns of the suspension after photolysis or radiolysis of *Solution-A* have been analyzed with a model of a Gaussian distribution of spheres together with fractal scattering in the lower  $q$  range and a contribution from core/shell cylinders of imogolite surrounded by gold atoms. Figures 2g in the main article shows the experimental SAXS patterns and the SAXS model adjusted on the experimental data. Table S3 summarizes the parameters used for the model.

**Table S3.** Parameters for the simulated SAXS profile of photolytically produced GNP-coupled Imo- $\text{CH}_3$  NTs subtracted with pristine Imo- $\text{CH}_3$ /water suspension scattering contribution (shown in Figure 2g). For more details on the parameters, see section 3 above.

| Photolytically produced GNPs-Imo- $\text{CH}_3$ |                                                       |                       |
|-------------------------------------------------|-------------------------------------------------------|-----------------------|
| Gaussian sphere distribution                    | Sphere concentration ( $N$ : part. $\text{cm}^{-3}$ ) | $1.0 \times 10^{13}$  |
|                                                 | Mean diameter (nm)                                    | 9.5                   |
|                                                 | Polydispersity                                        | 2                     |
|                                                 | SLD of spheres ( $\text{cm}^{-2}$ )                   | $1.31 \times 10^{12}$ |
|                                                 | SLD of medium ( $\text{cm}^{-2}$ )                    | 0                     |
| Fractal contribution                            | $B$ amplitude                                         | 0.0045                |
|                                                 | $D$ fractal slope                                     | 1.8                   |
|                                                 | $R_g$ (nm)                                            | 8.0                   |
|                                                 | $b_f$                                                 | 0.0004                |

The average GNP size, as obtained by SAXS analysis, is in agreement with the SEM/TEM analysis. Concerning the number of particles, SAXS analysis led to a value of  $1.0 \times 10^{13}$  part. $\text{cm}^{-3}$ , which corresponds to a volume fraction of  $5.10 \times 10^{-6}$ , a significantly smaller value than the expected one calculated from the ICP-MS Au composition ( $9.80 \times 10^{-6}$ ). This could

be attributed to the presence of small particles and clusters adsorbed on imogolite, resulting in a mass fractal organization visible in the low  $q$  range data. From the Porod invariant law (a general property of SAXS diagram),<sup>1</sup> the total gold volume fraction could be estimated. In a first approximation, gold is assumed to be only under the form of Au(0) with a SLD value of  $1.31 \times 10^{12} \text{ cm}^{-2}$ . A value of  $6.35 \times 10^{-6}$  is then obtained. This value includes the contribution of gold sphere nanoparticles and of the gold attached on the imogolite wall (with an indirect contribution in the low  $q$  range as fractal organization). This value is also lower than the one expected from the ICP-MS composition ( $9.80 \times 10^{-6}$ ), but higher than the contribution of only AuNPs ( $5.10 \times 10^{-6}$ ). In the present case, the invariant is underestimated because of the restricted  $q_{min}$  and the missing scattering part from aggregates (i.e., no visible Guinier region in the low  $q$  range). From this order of range, we see that only a small fraction of gold is under the form of spheres of  $9.5 \pm 2.0 \text{ nm}$ .

## **7. SAXS profile of radiolytically produced GNPs**

The SAXS pattern issued from radiolytically-produced samples is slightly different from that issued from photolytically-produced samples. The SAXS pattern can be fitted by a Gaussian distribution of spheres. We retrieve in the low  $q$  range a mass fractal organization issued from the small clusters and particles adsorbed on imogolite. Figure 3f in the main article shows the experimental SAXS pattern and the SAXS model adjusted on the experimental data. The parameters for the model are summarized in Table S4.



**Table S4.** Parameters for the simulated SAXS profile displayed in Figure 3f.

| <b>Radiolytically produced GNPs-Imo-CH<sub>3</sub></b> |                                                      |                       |
|--------------------------------------------------------|------------------------------------------------------|-----------------------|
| Gaussian sphere distribution                           | Sphere concentration ( $N$ : part.cm <sup>-3</sup> ) | $3.3 \times 10^{13}$  |
|                                                        | Mean diameter (nm)                                   | 5.0                   |
|                                                        | Polydispersity                                       | 2.0                   |
|                                                        | SLD of spheres (cm <sup>-2</sup> )                   | $1.31 \times 10^{12}$ |
|                                                        | SLD of medium (cm <sup>-2</sup> )                    | 0                     |
| Fractal contribution                                   | $B$ amplitude                                        | 0.02                  |
|                                                        | $D$ fractal slope                                    | 1.6                   |
|                                                        | $R_g$ (nm)                                           | 7.0                   |
|                                                        | $b_f$                                                | 0.0006                |

The volume fraction issued from spherical gold nanoparticles only (fitted by the double Gaussian distribution of spheres) is equal to  $3.20 \times 10^{-6}$ , while the volume fraction issued from the gold composition is equal to  $9.80 \times 10^{-6}$ . In this case also, gold could not be fully incorporated in the form of GNPs. A part of gold is missing, and is probably under small spherical particles or clusters adsorbed on the imogolites not detected by SAXS. As in the case of samples synthesized by the photolysis route, the Porod invariant law can be used to extract the gold volume fraction. Assuming that gold is only present as Au(0), the volume fraction is found to be  $6.55 \times 10^{-6}$ , a value still lower than the expected one. This corroborates that a fraction of gold exists in much smaller size than spheres of  $5.0 \pm 2.0$  nm.

## 8. Stability of the GNP-Imo-CH<sub>3</sub> photocatalysts

In order to use the GNP-coupled Imo-CH<sub>3</sub> nanotubes as photoreactors, the stability of the nanotubes during thermal treatment in alkaline condition, photolytic/radiolytic treatment, after the formation of GNPs on the external surface and after multiple cycles of photocatalytic applications is important. A unique characteristic of the tubular morphology of Imo-CH<sub>3</sub> NTs is their ability to form self-supported thin films upon drying.<sup>2</sup> The Imo-CH<sub>3</sub> nanotubes coupled with

GNPs and after uses as photocatalyst also produce similar self-supported thin films upon drying. This suggests that the tubular morphology of Imo-CH<sub>3</sub> remains intact after coupling with GNPs by photolytic/radiolytic reduction.

In our previous work, the stability of Imo-CH<sub>3</sub> nanotubes during photocatalytic applications under UV light (253.7 nm,  $4.15 \times 10^{19}$  photons.L<sup>-1</sup>.s<sup>-1</sup>) was tested using UV-Vis and Fourier Transform Infrared (FT-IR) spectroscopy for upto 5 hours of UV illumination. The morphology and chemical structure of Imo-CH<sub>3</sub> photocatalysts were found to be extremely stable.<sup>3</sup> In this work, in order to detect any change in the chemical structure of the NTs after coupling with GNPs, both the pristine and GNP-coupled Imo-CH<sub>3</sub> NTs, were studied by FT-IR spectroscopy using a Bruker Tensor 27 Fourier Transform Infrared (FT-IR) spectrometer (Figure S5). 1 wt% of the sample was dispersed in high purity KBr, then pelletized into self-supporting discs using a pressure of 10<sup>9</sup> Pa. Spectra were then recorded from 100 scans in the 350-4000 cm<sup>-1</sup> wavenumber range at a 2 cm<sup>-1</sup> resolution. The KBr background was subtracted in all cases. Clearly, the FT-IR absorption spectra of pristine and GNP-coupled Imo-CH<sub>3</sub> NTs are similar. The presence of a doublet at 956/910 cm<sup>-1</sup>, characteristic of the tubular structure of Imo-CH<sub>3</sub> due to Si-O-Al stretching and the band at 2980 cm<sup>-1</sup>, characteristic of -CH<sub>3</sub> asymmetric stretching, suggests the good morphological integrity of Imo-CH<sub>3</sub> NTs under UV photolysis/gamma radiolysis and also in the presence of the surface-attached GNPs. The change in mutual intensity in the doublet (956/910 cm<sup>-1</sup>) and the blue shift of the O-Al-O bending band (~ 419 cm<sup>-1</sup> in pristine Imo-CH<sub>3</sub>, ~423 cm<sup>-1</sup> in GNP-coupled Imo-CH<sub>3</sub>, together with a decrease in absorbance) are attributed to modifications in the local environment of Al due to the attachment of GNPs on the external surface of Imo-CH<sub>3</sub>. Table S5 summarizes the assignment of FT-IR bands of pristine and GNPs decorated Imo-CH<sub>3</sub> NTs.

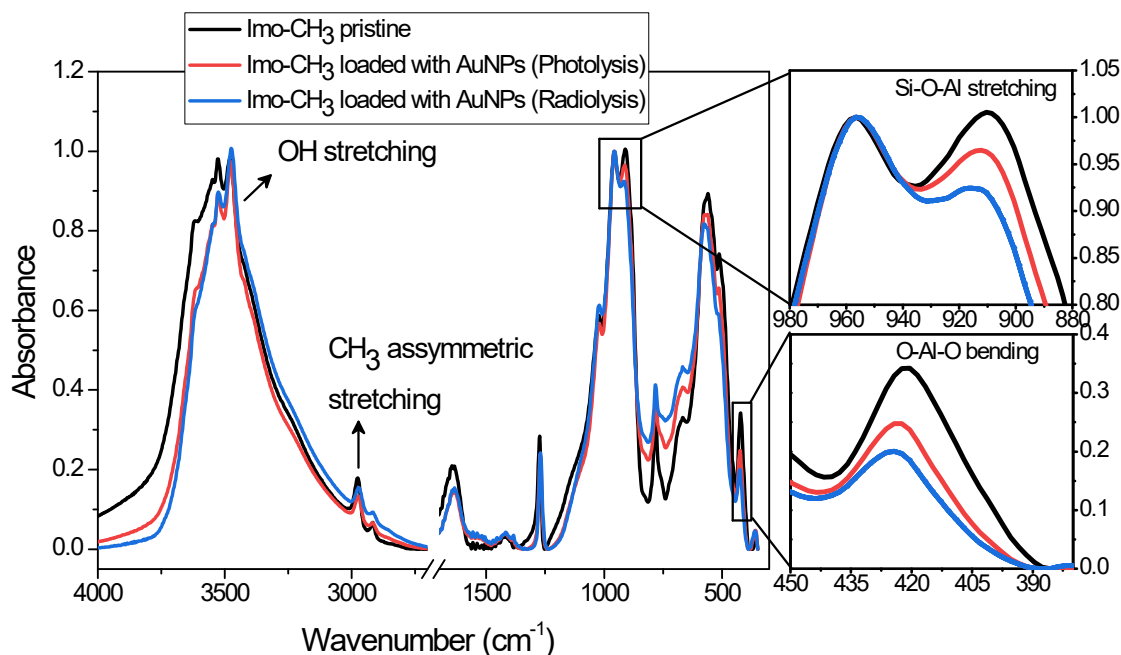

**Figure S5.** FT-IR spectra of pristine (black curve) and GNP-coupled Imo-CH<sub>3</sub> NTs prepared by UV photolysis (red curve) and gamma radiolysis (blue curve) of Solution-A.

**Table S5.** Assignment of the vibrational bands of pristine and GNP-coupled Imo-CH<sub>3</sub> NTs.

| Assignment                                                     | Wavenumber (cm <sup>-1</sup> )      |               |                  |
|----------------------------------------------------------------|-------------------------------------|---------------|------------------|
|                                                                | GNP-Imo-CH <sub>3</sub> prepared by |               |                  |
|                                                                | Imo-CH <sub>3</sub> pristine        | UV photolysis | Gamma radiolysis |
| O-H stretching                                                 | 4000-3000                           | 4000-3000     | 4000-3000        |
| CH <sub>2</sub> /CH <sub>3</sub> asymmetric stretching         | 2980-2910                           | 2980-2910     | 2980-2910        |
| symmetric deformation of CH <sub>3</sub> in Si-CH <sub>3</sub> | 1273                                | 1270          | 1270             |
| Si-O-Al stretching                                             | 956/910                             | 956/912       | 956/912          |
| CH <sub>3</sub> rocking and Si-C stretching                    | 782                                 | 782           | 782              |
| Al-O modes                                                     | 684, 570/548                        | 684, 570/548  | 684, 570/548     |

|                |     |     |     |
|----------------|-----|-----|-----|
| O-Si-O bending | 508 | 508 | 508 |
| O-Al-O bending | 419 | 423 | 423 |

In order to verify the stability of the surface coupled GNPs during the photocatalytic applications, UV-Vis spectrum of the GNP-Imo-CH<sub>3</sub> aqueous solution has been recorded after 9 repeated cycles of photocatalytic runs (1 hour of UV illumination, 253.7 nm, 4.15×10<sup>19</sup> photons.L<sup>-1</sup>.s<sup>-1</sup>, in each cycle) and compared with the UV-Vis spectrum of the GNP-Imo-CH<sub>3</sub> systems before. For the photolytically-prepared GNP coupled Imo-CH<sub>3</sub> system, the UV-Vis spectrum of the solution changes minimally before and after photocatalytic applications (see Figure S6a), suggesting good stability of the photolytically prepared photocatalysts. On the contrary, the UV-Vis spectrum of the radiolytically-prepared sample slightly modifies after 9 cycles of photocatalytic application (see Figure S6b). This suggests that the morphology and/or concentration of the radiolytically synthesized GNPs on Imo-CH<sub>3</sub> surface slightly modifies upon prolonged illumination under UV light. The lower stability of the GNP-Imo-CH<sub>3</sub> photocatalyst, prepared by radiolytic route, is attributed to the weaker coupling of GNPs on the Imo-CH<sub>3</sub> surface. However, due to the stronger coupling of GNPs with the Imo-CH<sub>3</sub> surface in case of photolytically prepared system, the GNPs exhibits good stability over 9 photocatalytic cycles.

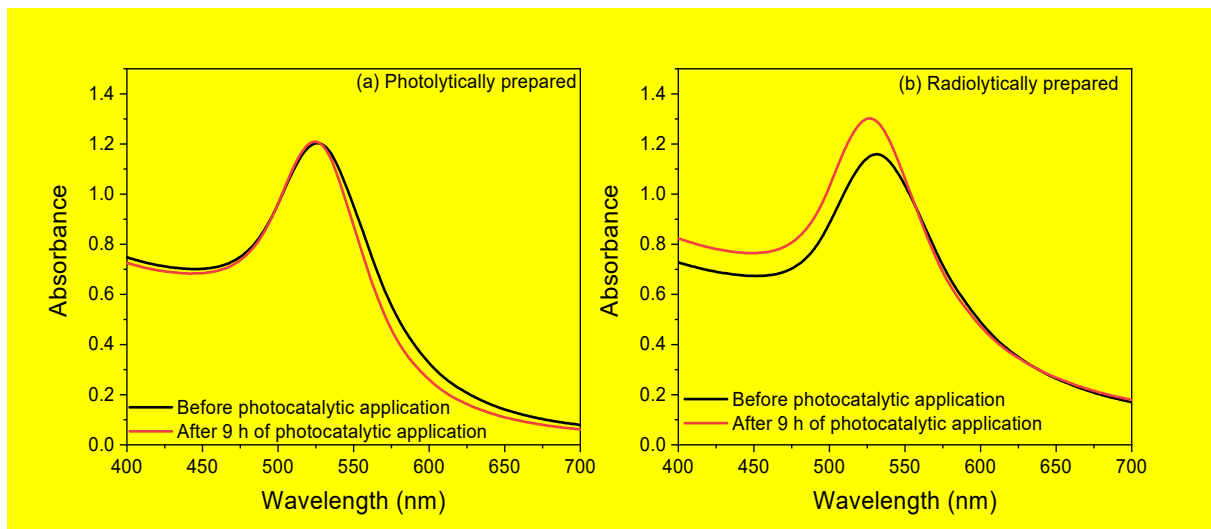

**Figure S6.** UV-Vis spectrum of degassed aqueous solution of photolytically and radiolytically prepared GNP-Imo-CH<sub>3</sub> photocatalyst mixed with 20 vol% propan 2-ol before and after 9 cycles of photocatalytic H<sub>2</sub> production (1 hour illumination under UV light, 253.7 nm,  $4.15 \times 10^{19}$  photons.L<sup>-1</sup>.s<sup>-1</sup>, in each cycle).

## 9. Redox balance model

We consider that among all photons involved in reaction R1,  $X \mu\text{mol.g}^{-1}.\text{h}^{-1}$  will lead to chemical reactions. As no net current is generated during this experiment, the quantity of e<sup>-</sup> and of h<sup>+</sup> involved in these chemical reactions has to be balanced.

We make the hypothesis that the propan-2-ol and its degradation products are strongly confined inside the nanotubes. Therefore, as far as oxidation reactions are concerned, we will consider the two pathways (R1) and (R2) described in the main text as the only possible chemical pathways. We introduced the probability  $p$  for h<sup>+</sup> to be involved respectively in (R1),  $(1-p)$  being the probability of (R2).

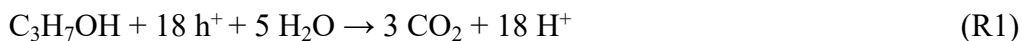

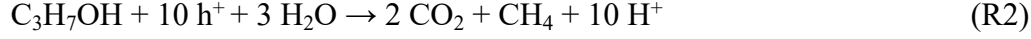

For the reduction side (R3-R6), we consider the following chemical reactions with respective probabilities  $r_1, r_2, r_3$  and  $r_4$  with  $r_1 + r_2 + r_3 + r_4 = 1$ .

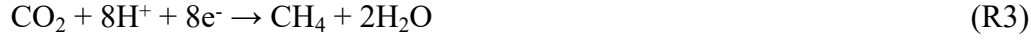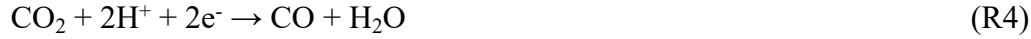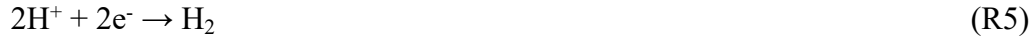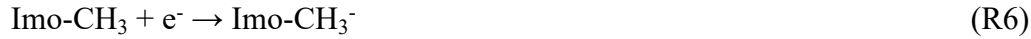

If we write all these equations by taking into account their probabilities, we can obtain the balance for all possible species for a single  $\text{e}^- / \text{h}^+$  pair.

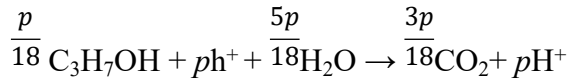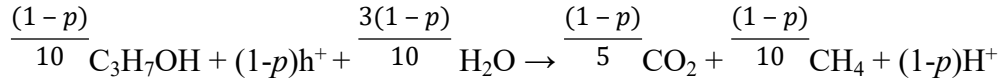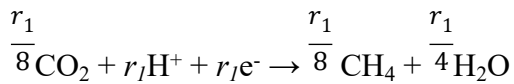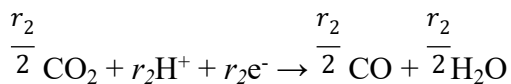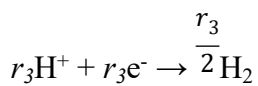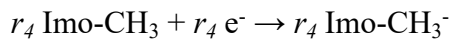

Knowing the initial gas production rates  $R_{CO}$ ,  $R_{CO_2}$ ,  $R_{CH_4}$  and  $R_{H_2}$  expressed in  $\mu\text{mol.g}^{-1}.\text{h}^{-1}$  (see Table 3 in the main text), we obtain the following solutions for the probabilities of the different chemical pathways:

$$r_1 = \frac{8R_{CH_4}}{X} - \frac{8(1-p)}{10}$$

$$r_2 = \frac{2R_{CO}}{X}$$

$$r_3 = \frac{2R_{H_2}}{X}$$

$$r_4 = 1 - r_1 - r_2 - r_3$$

$$p = \frac{9}{4} - \frac{15}{2X}(R_{CO} + R_{CO_2} + R_{CH_4})$$

The last reduction pathway with a probability  $r_4$  is written as the trapping of  $e^-$  in the defects of Imo-CH<sub>3</sub> NTs. It could also be the reduction of traces of remaining dioxygen as discussed in the main text. However, it does not change the general validity of the equations.

Thus there exists a range of active electron/hole pair generation rates  $X$  ( $\mu\text{mol.g}^{-1}.\text{h}^{-1}$ ) which satisfies these equations. Figure S7 represents the values of  $r_1$ ,  $r_2$ ,  $r_3$ ,  $r_4$  and  $p$  as a function of  $X$ .

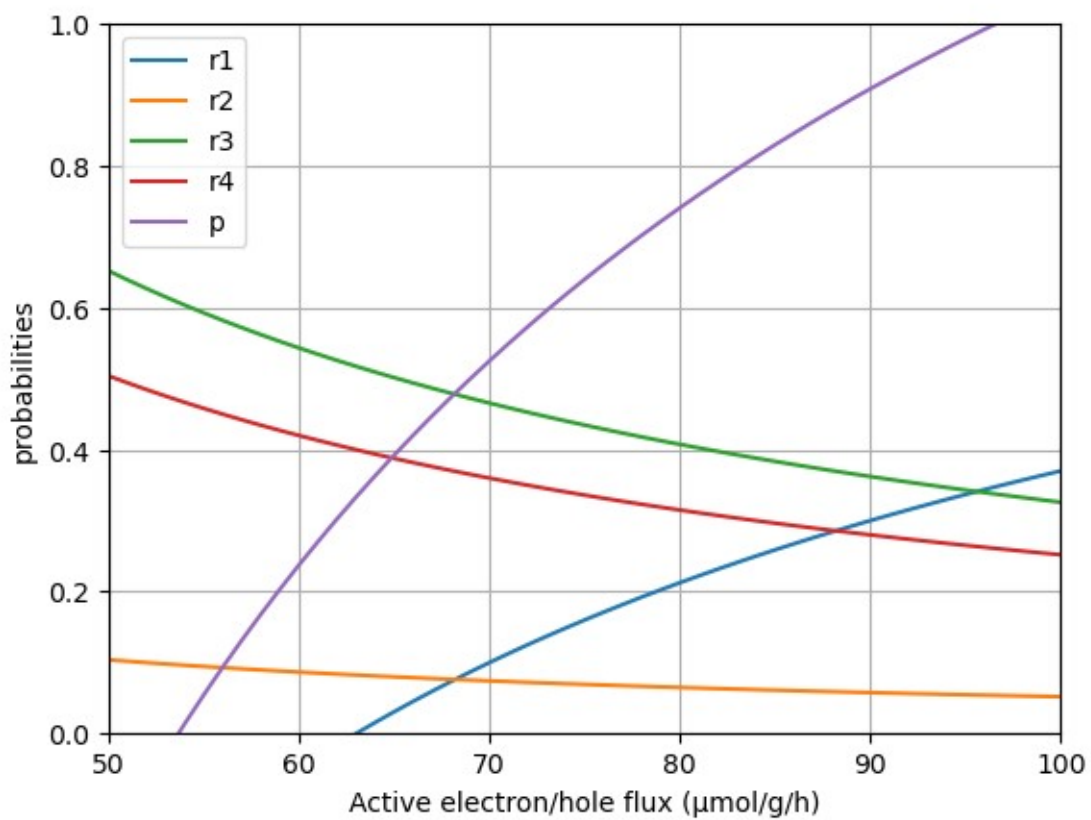

**F**  
*figure S7.* Probabilities  $p$  of oxidation according to reaction (R1) and of reduction pathways ( $r_1, r_2, r_3$  and  $r_4$ ) as a function of the active electrons/holes flux ( $\mu\text{mol}\cdot\text{g}^{-1}\cdot\text{h}^{-1}$ ).



**10. Fluorescence emission spectra of Imo-CH<sub>3</sub> NTs in aqueous solution at different excitation wavelengths**

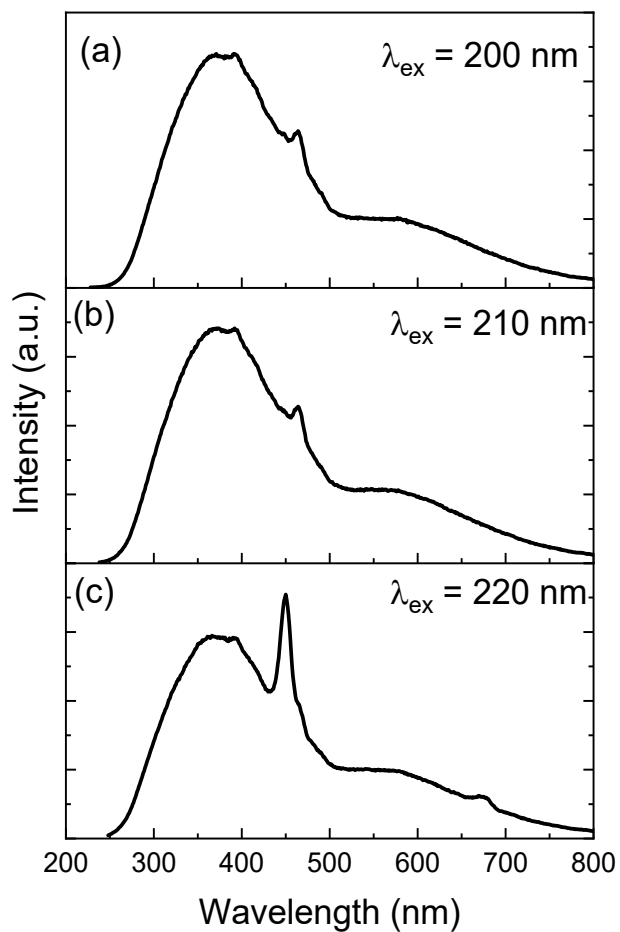

**Figure S7.** Fluorescence emission spectra of Imo-CH<sub>3</sub> NTs in aqueous solution at different excitation wavelengths.

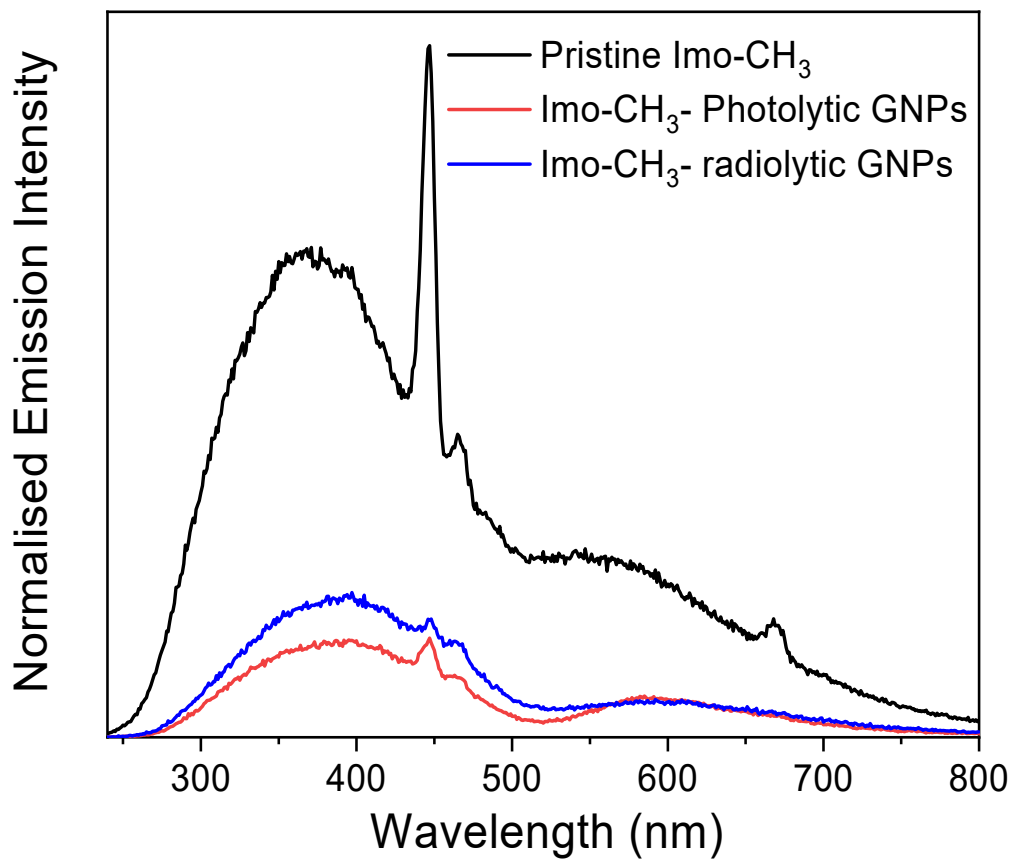

**Figure S8.** Fluorescence emission spectra of pristine Imo-CH<sub>3</sub> and Imo-CH<sub>3</sub> coupled to GNPs prepared by UV photolysis and gamma radiolysis with an excitation at 220 nm. The emission intensities are normalized with respect to the UV-Vis absorbance at 220 nm.

## 11. Gas Chromatography coupled to Mass Spectrometry (GC-MS) experiment

In order to identify the gases which could not be detected by  $\mu$ -GC, a GC-MS experiment was performed for the photolytic GNP-Imo-CH<sub>3</sub> system after 6 h of UV illumination under an argon atmosphere. An Agilent 6890 GC instrument and an Agilent 5973 Mass Spectrometer were used. The mass spectrometer was equipped with an electron impact source, and a quadrupole mass analyzer. The mass range was 4-160. Helium was used as the vector gas with a flow rate of 2

mL.min<sup>-1</sup>. Separation was carried out by two distinct separation modes: one with a CP-PorabondQ (25 m, Ø 0.32 mm) column (Varian), and on the other with a two-column system connected in parallel, a molecular sieve Rt-M Sieve 5 Å PLOT (30 m, Ø 0.53 mm) column (Restek) and a Rt-Q-PLOT (30 m, Ø 0.32 mm) column (Restek). The injector was set at 110°C in splitless mode. Figure S9 provides the GC-MS spectrum of the gases produced after 6h of UV illumination of a water/propan-2-ol (10 vol%) mixture in the presence of photolytically-produced GNP-coupled Imo-CH<sub>3</sub> NTs. Some small chain hydrocarbons along with ethanal and acetone were detected.

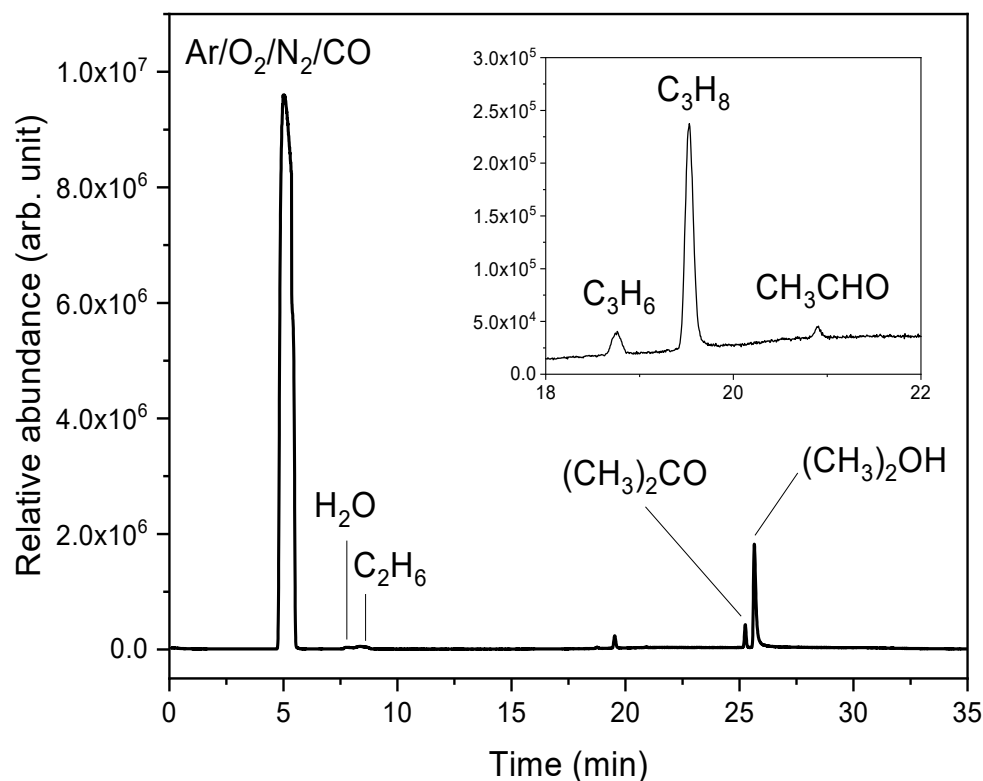

**Figure S9.** GC-MS spectrum of the gases produced after 6h of UV illumination of a water/propan-2-ol (10 vol%) mixture in the presence of photolytically-produced GNP-coupled Imo-CH<sub>3</sub> NTs.

## References

1. O. Spalla, General Theorems in Small-Angle Scattering. In *Neutrons, X-rays, and Light: Scattering Methods Applied to Soft Condensed Matter*, T. Zemb, P. Lindner, Eds.; Elsevier: Amsterdam; Boston, 2002.
2. Y. Liao, P. Picot, J-B. Brubach, P. Roy, S. Le Caër, A. Thill, *Applied Clay Science*, 2018, **164**, 58-67.
3. S. Patra, D. Schaming, P. Picot, M-C. Pignié, J-B. Brubach, L. Sicard, S. Le Caër, A. Thill, *Environ. Sci.: Nano*, 2021, **8**, 2523-2541.
